# Supplementary material for: Brain-to-brain entrainment: EEG interbrain synchronization while speaking and listening
Source: Springer Nature journal article supplement (doi:10.1038/s41598-017-04464-4), 2017-06-19
Supplement: MOESM1 [file 41598_2017_4464_MOESM1_ESM.pdf]

**Brain-to-brain entrainment: EEG interbrain synchronization while speaking and listening.**

*Authors: Alejandro Pérez<sup>\*</sup>, Manuel Carreiras & Jon Andoni Duñabeitia.*

<sup>\*</sup>Corresponding author

# t values from the brain-to-brain synchronization analysis

### Delta band

| Row   | Fp1_L | Fp2_L | F3_L  | F4_L | C3_L | C4_L | P3_L  | P4_L  | O1_L  | O2_L  | F7_L | F8_L | T7_L  | T8_L  | P7_L  | P8_L  | Fz_L | Cz_L | Pz_L | FC1_L | FC2_L | CP1_L | CP2_L | CP5_L | CP6_L | FC1_S | FC2_S | CP1_S | CP2_S | CP5_S | CP6_S |      |      |       |       |       |      |      |      |      |       |       |       |      |      |      |       |      |      |      |      |      |       |      |
|-------|-------|-------|-------|------|------|------|-------|-------|-------|-------|------|------|-------|-------|-------|-------|------|------|------|-------|-------|-------|-------|-------|-------|-------|-------|-------|-------|-------|-------|------|------|-------|-------|-------|------|------|------|------|-------|-------|-------|------|------|------|-------|------|------|------|------|------|-------|------|
| Fp1_L | 0.69  | 0.23  | -0.23 | 0.82 | 0.20 | 0.03 | -0.41 | -0.64 | -1.03 | -1.13 | 1.34 | 1.85 | -0.53 | -0.24 | -0.89 | -1.08 | 0.17 | 0.04 | 0.13 | -0.79 | 0.82  | 0.36  | 0.28  | 0.56  | 0.86  | -0.33 | 0.11  | 1.84  | 1.65  | 0.72  | 0.59  | 0.84 | 0.17 | -0.51 | -0.14 | -0.22 | 0.90 | 1.86 | 1.75 | 0.31 | -0.20 | -0.90 | -0.52 | 0.48 | 0.28 | 0.13 | -0.17 | 0.97 | 0.47 | 0.05 | 0.73 | 0.29 | -0.86 | 0.36 |

### Theta band

| Row   | Fp1_L | Fp2_L | F3_L  | F4_L | C3_L | C4_L  | P3_L  | P4_L | O1_L | O2_L | F7_L  | F8_L  | T7_L  | T8_L  | P7_L  | P8_L | Fz_L  | Cz_L  | Pz_L  | FC1_L | FC2_L | CP1_L | CP2_L | CP5_L | CP6_L | FC1_S | FC2_S | CP1_S | CP2_S | CP5_S | CP6_S |      |       |       |      |      |      |       |       |       |      |      |      |       |       |       |       |      |      |       |       |       |      |
|-------|-------|-------|-------|------|------|-------|-------|------|------|------|-------|-------|-------|-------|-------|------|-------|-------|-------|-------|-------|-------|-------|-------|-------|-------|-------|-------|-------|-------|-------|------|-------|-------|------|------|------|-------|-------|-------|------|------|------|-------|-------|-------|-------|------|------|-------|-------|-------|------|
| Fp1_L | 2.64  | -1.88 | -2.62 | 0.91 | 0.63 | -1.16 | -0.42 | 0.14 | 0.98 | 0.56 | -2.93 | -1.72 | -2.35 | -0.32 | -0.13 | 0.11 | -0.71 | -0.80 | -1.04 | -2.39 | -1.74 | 0.05  | -0.57 | -1.82 | -2.75 | -0.81 | 2.24  | -1.95 | -1.42 | -2.66 | -0.64 | 0.53 | -0.96 | -0.75 | 0.14 | 0.41 | 0.36 | -2.82 | -1.54 | -1.78 | 1.25 | 0.23 | 0.07 | -0.63 | -0.12 | -2.36 | -0.80 | 0.05 | 0.47 | -2.21 | -1.96 | -0.77 | 0.44 |

### Alpha band

| Row   | Fp1_L | Fp2_L | F3_L  | F4_L | C3_L | C4_L | P3_L | P4_L  | O1_L | O2_L  | F7_L | F8_L | T7_L | T8_L  | P7_L | P8_L  | Fz_L | Cz_L | Pz_L | FC1_L | FC2_L | CP1_L | CP2_L | CP5_L | CP6_L | FC1_S | FC2_S | CP1_S | CP2_S | CP5_S | CP6_S |      |      |       |      |       |       |      |      |       |      |       |       |      |      |       |      |      |      |       |      |      |       |
|-------|-------|-------|-------|------|------|------|------|-------|------|-------|------|------|------|-------|------|-------|------|------|------|-------|-------|-------|-------|-------|-------|-------|-------|-------|-------|-------|-------|------|------|-------|------|-------|-------|------|------|-------|------|-------|-------|------|------|-------|------|------|------|-------|------|------|-------|
| Fp1_L | 0.19  | 0.48  | -0.58 | 0.82 | 1.79 | 1.98 | 2.37 | -0.73 | 0.42 | -1.26 | 0.60 | 0.85 | 0.32 | -0.21 | 0.34 | -0.02 | 1.16 | 1.49 | 2.51 | -0.95 | 1.17  | 2.97  | 2.25  | -0.58 | 1.39  | -1.16 | -0.80 | -0.87 | -0.87 | -0.70 | 2.27  | 1.11 | 2.91 | -0.46 | 1.34 | -0.34 | -0.13 | 0.05 | 1.86 | -0.02 | 1.19 | -3.34 | -0.72 | 1.70 | 3.40 | -0.61 | 0.66 | 3.67 | 2.04 | -0.71 | 0.86 | 2.35 | -0.66 |

### Beta band

| Row   | Fp1_L | Fp2_L | F3_L  | F4_L  | C3_L | C4_L | P3_L | P4_L | O1_L | O2_L  | F7_L  | F8_L  | T7_L | T8_L | P7_L | P8_L  | Fz_L | Cz_L  | Pz_L  | FC1_L | FC2_L | CP1_L | CP2_L | CP5_L | CP6_L | FC1_S | FC2_S | CP1_S | CP2_S | CP5_S | CP6_S |      |      |      |      |       |       |       |       |       |      |       |       |      |      |       |      |      |       |       |      |      |      |
|-------|-------|-------|-------|-------|------|------|------|------|------|-------|-------|-------|------|------|------|-------|------|-------|-------|-------|-------|-------|-------|-------|-------|-------|-------|-------|-------|-------|-------|------|------|------|------|-------|-------|-------|-------|-------|------|-------|-------|------|------|-------|------|------|-------|-------|------|------|------|
| Fp1_L | -1.61 | -1.46 | -0.02 | -0.09 | 0.47 | 1.40 | 0.23 | 1.05 | 0.33 | -1.13 | -0.57 | -0.14 | 0.40 | 0.13 | 0.49 | -1.45 | 0.14 | -0.01 | -0.52 | 1.18  | -0.43 | 0.60  | -0.07 | -0.20 | 0.01  | 2.23  | -2.30 | -0.57 | -0.41 | -1.10 | 1.50  | 0.00 | 1.46 | 0.38 | 0.63 | -1.60 | -1.10 | -0.72 | -1.18 | -0.85 | 0.47 | -0.14 | -1.09 | 0.46 | 0.99 | -0.07 | 0.82 | 0.03 | -0.05 | -0.54 | 0.61 | 0.86 | 0.29 |

**Supplemental Figure 1:** Group-level statistical results from the brain-to-brain synchronization analysis at the different frequency bands. The matrices contain the t values from nonparametric bootstrap-based t-test method.

## t values from the brain-audio synchronization analysis

|     |      |      |       |      |       |      |       |       |
|-----|------|------|-------|------|-------|------|-------|-------|
| Fp1 | 2.92 | 7.06 | 1.71  | 5.33 | 0.05  | 1.32 | -0.59 | 0.55  |
| Fp2 | 3.94 | 6.38 | 1.33  | 5.85 | 0.03  | 1.73 | 0.72  | -0.43 |
| F3  | 3.28 | 6.33 | 2.15  | 5.30 | 0.67  | 1.57 | 0.48  | 0.79  |
| F4  | 3.15 | 6.08 | 2.52  | 6.09 | 1.52  | 0.86 | 0.24  | 0.88  |
| C3  | 3.79 | 5.26 | -0.54 | 3.64 | 0.41  | 1.73 | -0.20 | 1.69  |
| C4  | 3.05 | 4.31 | 0.94  | 5.55 | 0.00  | 2.08 | 0.38  | 0.32  |
| P3  | 2.90 | 5.24 | -1.37 | 3.10 | -1.16 | 1.30 | -0.18 | -0.23 |
| P4  | 2.38 | 4.91 | -0.94 | 4.12 | 0.62  | 1.12 | 0.09  | -0.26 |
| O1  | 2.36 | 6.55 | -1.33 | 3.47 | 0.42  | 1.77 | -2.26 | 0.86  |
| O2  | 1.66 | 7.06 | 0.99  | 3.75 | 0.51  | 0.43 | 0.44  | 1.50  |
| F7  | 2.59 | 6.04 | 0.50  | 4.79 | -0.03 | 1.08 | 1.74  | 0.86  |
| F8  | 3.52 | 5.44 | 1.46  | 6.10 | 1.18  | 2.34 | 0.85  | 0.90  |
| T7  | 3.15 | 5.32 | 0.22  | 5.82 | -0.48 | 2.22 | 0.99  | 1.48  |
| T8  | 3.68 | 6.29 | 1.26  | 7.13 | 0.53  | 1.28 | 0.70  | 0.33  |
| P7  | 3.61 | 4.94 | -1.51 | 5.78 | -0.76 | 2.37 | -2.01 | -0.83 |
| P8  | 2.01 | 6.10 | 0.79  | 5.69 | 0.81  | 1.86 | 0.19  | 1.00  |
| Fz  | 3.08 | 7.39 | 2.20  | 5.42 | 1.26  | 2.14 | -0.32 | 0.60  |
| Cz  | 3.16 | 4.78 | 0.42  | 5.21 | 1.32  | 3.04 | -0.41 | 2.21  |
| Pz  | 2.04 | 4.87 | -1.13 | 3.24 | 0.74  | 1.00 | -0.82 | 0.94  |
| FC1 | 3.48 | 5.93 | 1.35  | 4.61 | 1.29  | 2.86 | -0.31 | 1.40  |
| FC2 | 3.14 | 5.17 | 1.85  | 5.68 | 1.20  | 1.95 | 0.77  | 0.56  |
| CP1 | 2.43 | 4.30 | -0.55 | 3.76 | -0.49 | 1.31 | -1.12 | 0.78  |
| CP2 | 1.87 | 3.64 | -0.78 | 4.45 | 0.01  | 1.07 | -0.80 | 0.07  |
| FC5 | 3.77 | 7.42 | 1.94  | 4.74 | 0.65  | 1.74 | 0.49  | 1.28  |
| FC6 | 3.76 | 5.97 | 2.15  | 6.19 | -0.05 | 2.05 | 1.12  | 0.08  |
| CP5 | 3.00 | 5.52 | -1.90 | 3.88 | -0.28 | 2.01 | -0.63 | 0.33  |
| CP6 | 2.64 | 4.50 | 0.04  | 4.90 | -0.17 | 1.16 | -1.31 | 0.46  |

Listener-Delta    Speaker-Delta    Listener-Theta    Speaker-Theta    Listener-Alpha    Speaker-Alpha    Listener-Beta    Speaker-Beta

**Supplementary Figure 2:** Group-level statistical results from the brain-audio envelope synchronization analysis of the Listener and the Speaker at the different frequency bands. The matrix contains the t values from nonparametric bootstrap-based t-test method.



# Results from the multiple linear regression modelling

## Model 1: listener brain-audio entrainment as predictor

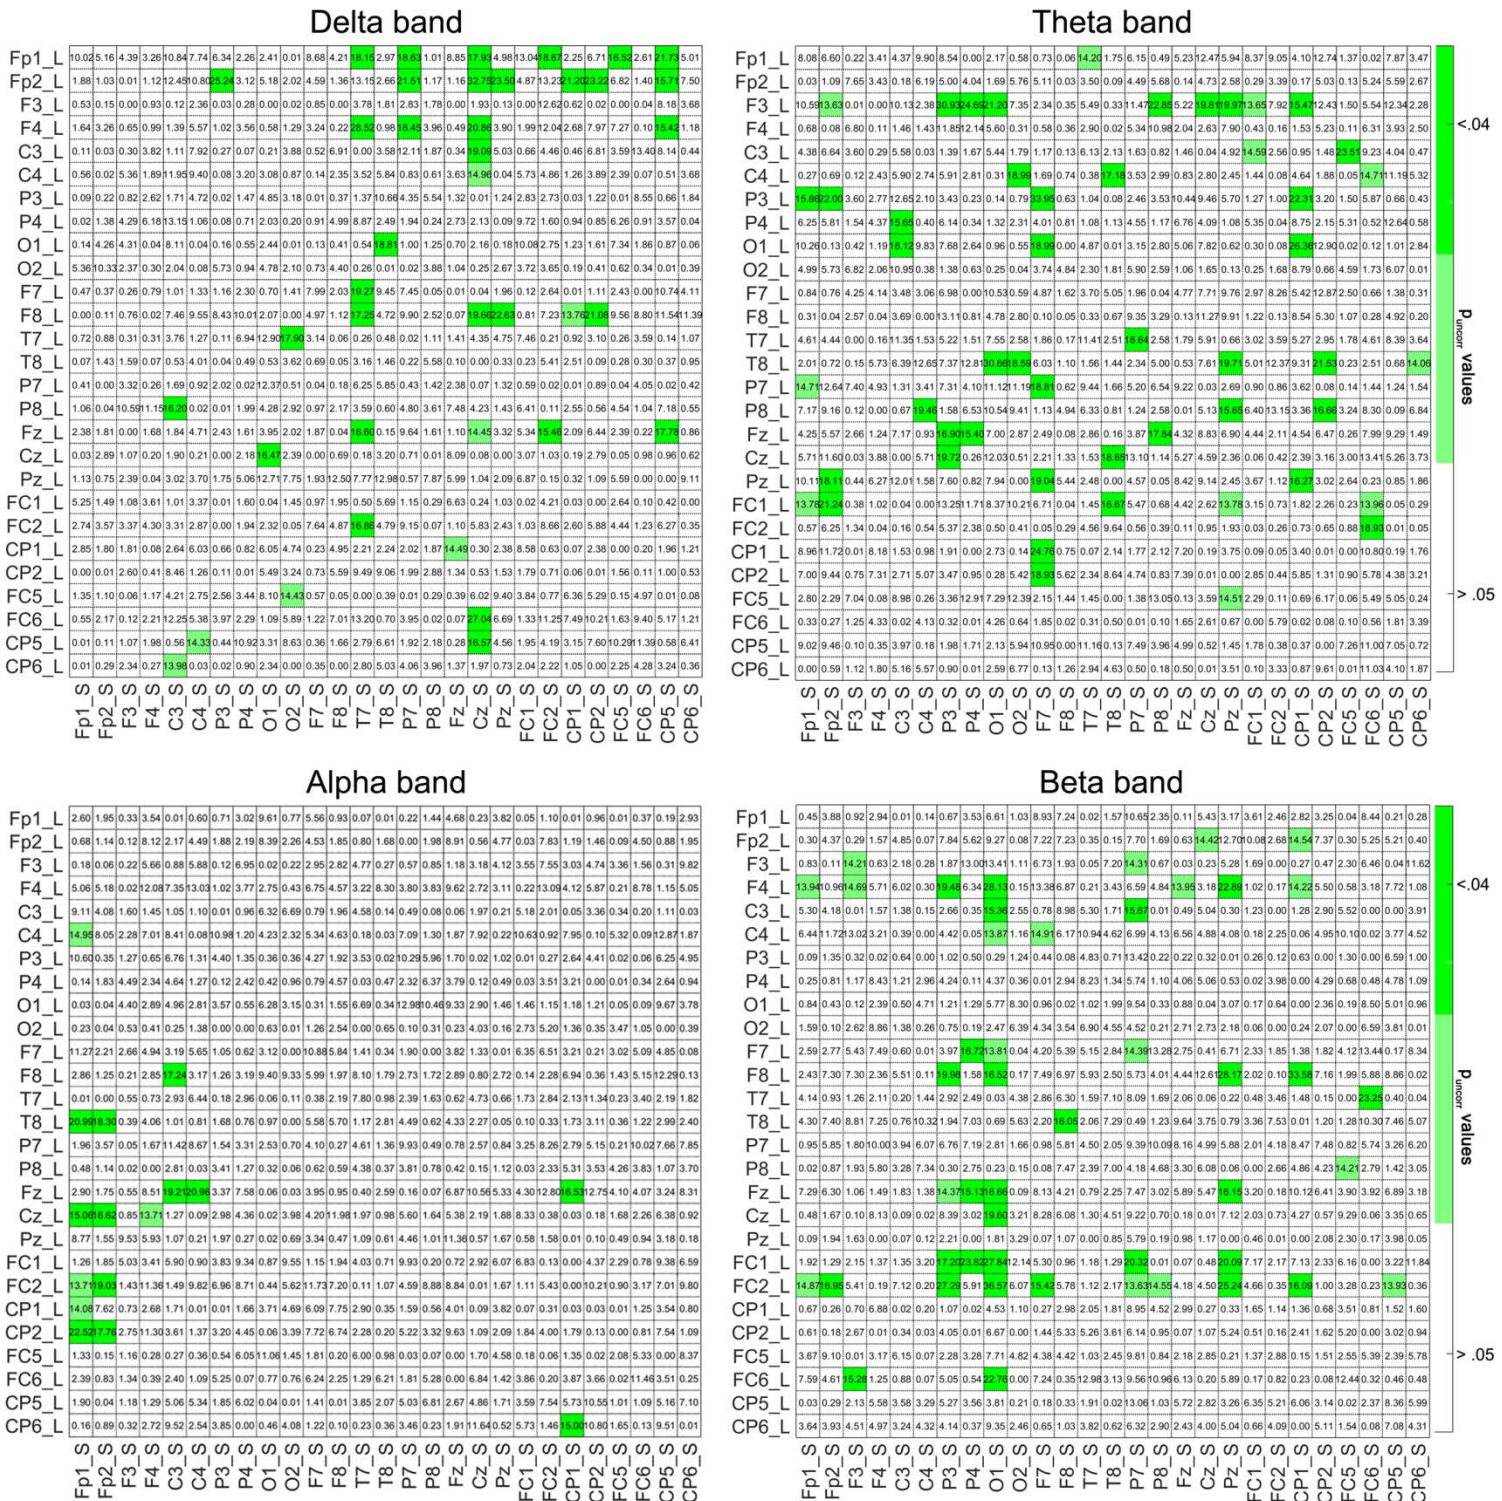

**Supplementary Figure 4:** Group-level statistical results from the multiple linear regression modelling analysis (Model 1) at the different frequency bands. The matrixes contain the coefficient estimates (R2 values) for a multiple linear regression of the brain-to-brain entrainment response using as predictor the brain entrainment to speech of the listeners. Statistically significant percentage of variance explained is indicated by coloring in green the corresponding cells where  $p < .05$ . Rows represent the electrodes of the Listener and columns represent the electrodes of the Source.

# Results from the multiple linear regression modelling

## Model 2: speaker brain-audio entrainment as predictor

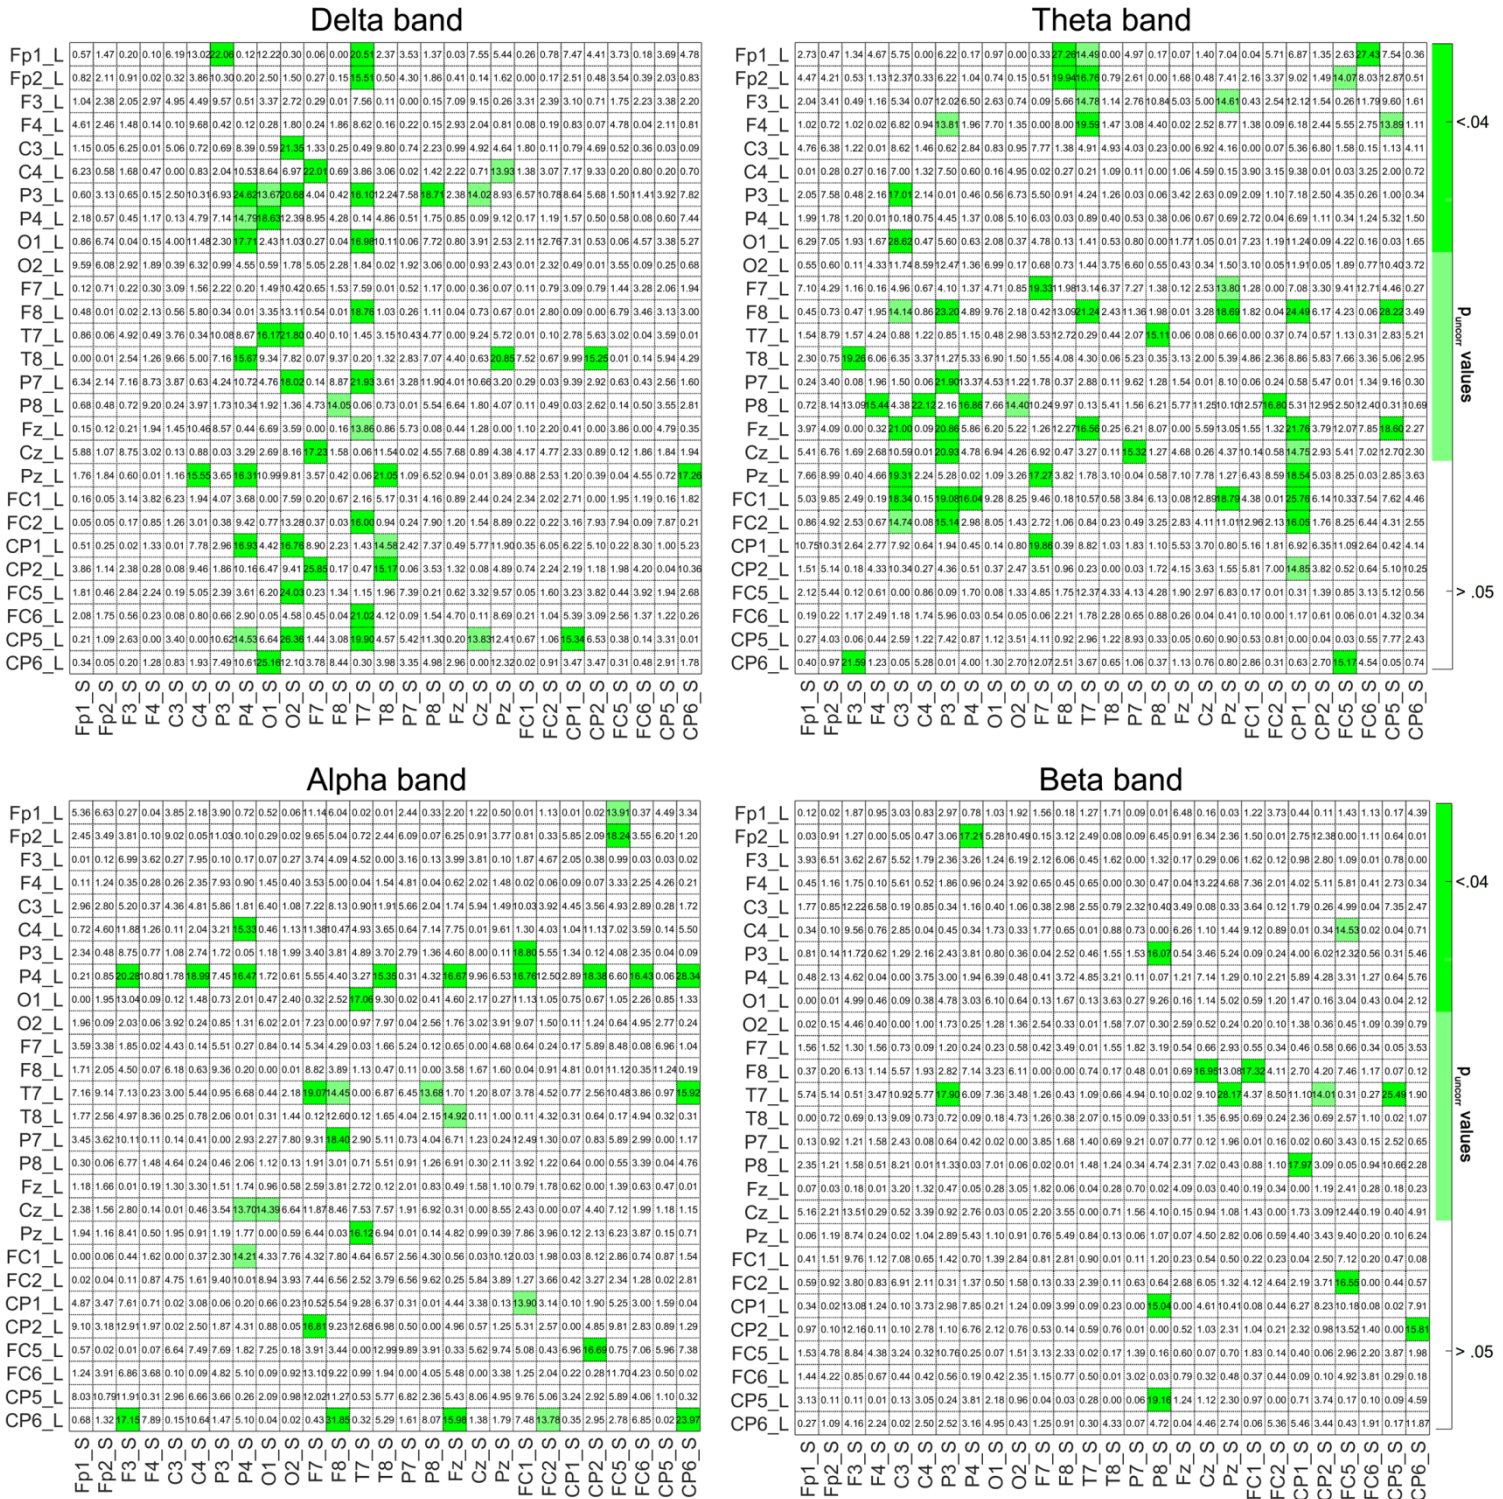

**Supplementary Figure 5:** Group-level statistical results from the multiple linear regression modelling analysis (Model 2) at the different frequency bands. The matrixes containing the coefficient estimates (R2 values) for a multilinear regression of the brain-to-brain entrainment response using as predictor the brain entrainment to speech of the speakers. Statistically significant percentage of variance explained is indicated by coloring in green the corresponding cells where  $p < .05$ . Rows represent the electrodes of the Listener and columns represent the electrodes of the Speaker.



## Brain-audio envelope synchronization

|     |      |      |      |      |      |      |      |      |
|-----|------|------|------|------|------|------|------|------|
| Fp1 | 6.99 | 8.49 | 4.20 | 6.33 | 4.27 | 4.48 | 3.30 | 3.54 |
| Fp2 | 7.11 | 8.26 | 4.17 | 6.78 | 4.27 | 4.59 | 3.59 | 3.45 |
| F3  | 7.04 | 8.33 | 4.17 | 6.59 | 4.42 | 4.55 | 3.52 | 3.54 |
| F4  | 6.97 | 8.43 | 4.20 | 7.09 | 4.61 | 4.43 | 3.47 | 3.56 |
| C3  | 6.88 | 8.29 | 3.78 | 6.18 | 4.40 | 4.63 | 3.48 | 3.60 |
| C4  | 6.56 | 8.67 | 3.99 | 7.06 | 4.33 | 4.82 | 3.45 | 3.52 |
| P3  | 6.35 | 7.53 | 3.66 | 5.61 | 4.06 | 4.58 | 3.57 | 3.30 |
| P4  | 6.17 | 8.02 | 3.68 | 5.72 | 4.31 | 4.64 | 3.41 | 3.47 |
| O1  | 6.14 | 8.34 | 3.71 | 5.57 | 4.43 | 4.67 | 3.29 | 3.54 |
| O2  | 6.09 | 9.29 | 3.92 | 5.33 | 4.34 | 4.52 | 3.57 | 3.75 |
| F7  | 6.86 | 8.81 | 4.01 | 6.63 | 4.25 | 4.53 | 3.51 | 3.61 |
| F8  | 6.91 | 8.33 | 4.13 | 7.28 | 4.48 | 4.78 | 3.57 | 3.54 |
| T7  | 6.74 | 8.74 | 3.97 | 6.36 | 4.17 | 4.64 | 3.68 | 3.61 |
| T8  | 7.02 | 9.37 | 4.07 | 7.41 | 4.29 | 4.55 | 3.43 | 3.38 |
| P7  | 6.61 | 8.91 | 3.71 | 7.12 | 4.18 | 4.77 | 3.24 | 3.30 |
| P8  | 6.07 | 9.82 | 3.89 | 6.36 | 4.41 | 4.66 | 3.52 | 3.71 |
| Fz  | 7.00 | 8.30 | 4.20 | 6.79 | 4.57 | 4.62 | 3.43 | 3.58 |
| Cz  | 6.79 | 7.77 | 4.02 | 6.68 | 4.53 | 4.96 | 3.44 | 3.72 |
| Pz  | 6.14 | 7.42 | 3.69 | 5.53 | 4.25 | 4.56 | 3.43 | 3.55 |
| FC1 | 7.03 | 8.20 | 4.13 | 6.55 | 4.59 | 4.84 | 3.43 | 3.64 |
| FC2 | 6.85 | 8.60 | 4.16 | 7.14 | 4.56 | 4.73 | 3.63 | 3.57 |
| CP1 | 6.35 | 7.50 | 3.83 | 5.96 | 4.24 | 4.60 | 3.39 | 3.46 |
| CP2 | 6.21 | 7.60 | 3.73 | 6.09 | 4.25 | 4.64 | 3.34 | 3.45 |
| FC5 | 7.45 | 8.86 | 4.20 | 6.78 | 4.38 | 4.64 | 3.63 | 3.56 |
| FC6 | 7.03 | 8.80 | 4.20 | 7.48 | 4.28 | 4.61 | 3.45 | 3.49 |
| CP5 | 6.46 | 7.80 | 3.61 | 6.38 | 4.30 | 4.72 | 3.47 | 3.37 |
| CP6 | 6.21 | 8.94 | 3.81 | 6.45 | 4.19 | 4.69 | 3.14 | 3.55 |

Raw PLVs ( $\times 10^{-2}$ )

Listener-Delta
Speaker-Delta
Listener-Theta
Speaker-Theta
Listener-Alpha
Speaker-Alpha
Listener-Beta
Speaker-Beta

**Supplementary Figure 7:** Mean raw PLVs (averaged across conditions) obtained from the brain-audio envelope synchronization analysis in all the frequency bands. Each cell corresponds to a listener-speaker electrode pair. Rows are the electrodes and columns are the cases: Listener and the Speaker in each frequency band. Values are in scientific notation (i.e.  $PLV \times 10^{-2}$ ).

**Supplementary Video 1:** Movie showing a 3D topographical representation of statistically significant enhanced alpha band interbrain synchronization patterns between listeners (blue head) and speakers (red head) during oral narratives. Green lines connect those electrode pairs showing an enhanced interbrain synchronization not explained by brain-audio envelope synchronizations.

**Supplementary Video 2:** Movie showing a 3D topographical representation of statistically significant enhanced beta band interbrain synchronization patterns between listeners (blue head) and speakers (red head) during oral narratives. Green lines connect those electrode pairs showing an enhanced interbrain synchronization not explained by brain-audio envelope synchronizations.
